# Supplementary material for: Niche differentiation of bacterial communities at a millimeter scale in Shark Bay microbial mats
Source: PubMed Central journal article supplement (PMC4620479; doi:10.1038/srep15607), 2015-10-26
Supplement: srep15607-s1.pdf [file srep15607-s1.pdf]

**Niche differentiation of bacterial communities at a millimeter scale in Shark Bay  
microbial mats**

Hon Lun Wong<sup>1,3</sup>, Daniela-Lee Smith<sup>1,3</sup>, Pieter T. Visscher<sup>2,3</sup>, Brendan P. Burns<sup>1,3</sup>

<sup>1</sup>School of Biotechnology and Biomolecular Sciences, The University of New South  
Wales, Sydney, Australia

<sup>2</sup>Department of Marine Sciences, University of Connecticut, USA

<sup>3</sup>Australian Centre for Astrobiology, University of New South Wales Sydney,  
Australia

\*Corresponding author:

Dr Brendan P. Burns

School of Biotechnology and Biomolecular Sciences, University of New South  
Wales, Sydney, 2052, Australia.

Phone: 612 93853659.

Fax: 612 93851591.

Email: [brendan.burns@unsw.edu.au](mailto:brendan.burns@unsw.edu.au)

**Subject category:** Microbial ecology and functional diversity of natural habitats

**Supplementary Figure S1. Rarefaction curves of smooth and pustular mats layers.**

The bottom layer of smooth mats (SD10, 19 – 20 mm) has the highest number of different OTUs, followed by the 6<sup>th</sup> layer of smooth mats (SD6, 11 – 12 mm) and the bottom layer of pustular mats (PD5, 9 – 10 mm). P1 to P5 refer to pustular mat layers 1 - 5, while S1 – S10 refer to smooth mat layers 1 – 10.

**Supplementary Figure S2. Abundance of some prominent phyla and taxonomic subgroups by depth in smooth mats.** A. Proteobacteria, B. Cyanobacteria, C. Chloroflexi, D. Bacteroidetes, E. Planctomycetes, F. Spirochaetes, G. Firmicutes, H. Other low abundance phyla

**Supplementary Figure S3. Abundance of some prominent phyla and taxonomic subgroups by depth in pustular mats.** A. Proteobacteria, B. Cyanobacteria, C. Chloroflexi, D. Bacteroidetes, E. Planctomycetes, F. Spirochaetes and Firmicutes, G. Other low abundance phyla

**Supplementary Figure S4. STAMP analysis of taxonomy enriched or depleted between the designated groups and all other groups in smooth mats.** A. Surface group compared to the other three groups, showing the surface of smooth mats is characterised by Cyanobacteria, Bacteroidetes, Alpha- and Gammaproteobacteria (Green dots). B. Group A compared to all other groups, showing Group A is represented by class Anaerolineae and classes of Spirochaetes (Blue dots) C. Group B compared to all other three groups, showing Group B is characterised mainly by Planctomycetes (Red dots). D. Bottom layer compared to all other groups, showing the bottom layer is represented by mainly Deltaproteobacteria and candidate phylum OP3 (Brown dots). All tests were performed using Welch's t-tests and subjected to Benjamini-Hochberg FDR correction.

**Supplementary Figure S5. STAMP analysis of taxonomy enriched or depleted between the designated groups and all other groups in pustular mats.** A. Surface group compared to the other two groups, showing the surface of smooth mats is characterised by Cyanobacteria and Bacteroidetes (Green dots). B. Bottom layer of pustular mats compared to all other groups, showing the bottom layer is represented Gammaproteobacteria (Red dots) All tests were performed using Welch's t-tests and subjected to Benjamini-Hochberg FDR correction. Group C cluster in pustular mats showed no bacteria taxa that were significantly enriched or depleted.

**Supplementary Figure S6. Network correlation analysis at the bacterial class level of smooth mats.** Connections are given for a strong (Pearson's  $p > 0.6$ ) and significant ( $p$ -value  $< 0.001$ ) correlations. Diamond shaped nodes represent elements whilst eclipse shaped nodes represent bacterial classes. Alpha- and Deltaproteobacteria were presented at the order level. Green lines indicate positive correlations whilst red lines indicate negative correlations. There are 48 nodes and 141 edges in the network. Different colours indicate elements and bacterial

phyla. Element nodes in yellow represents correlation with bacteria whilst element nodes in white indicates no correlation with bacteria. Green: Cyanobacteria, Red: Bacteroidetes, Blue: Alphaproteobacteria, Orange: Gammaproteobacteria, Pink: Deltaproteobacteria, Purple: Chloroflexi, White: Planctomycetes, Light pink: Caldithrix, Light blue: Lentisphaeria, Light grey: OP8, Brown: Spirochaetes, Dark purple: Firmicutes, Dark green: Others (Bacterial phyla OP3, GN04, TM6, WS3, BRC1, Fibrobacteres and SAR406).

**Supplementary Figure S7. Network correlation analysis at the bacterial class level of pustular mats.** Connections are given for a strong (Pearson's  $p > 0.6$ ) and significant ( $p$ -value  $< 0.001$ ) correlations. Diamond shaped nodes represent elements whilst eclipse shaped nodes represent bacterial classes. Alpha- and Deltaproteobacteria were presented at the order level. Green lines indicate positive correlations whilst red lines indicate negative correlations. There are 42 nodes and 139 edges in the network. Different colours indicate elements and bacterial phyla. Element nodes in yellow represents correlation with bacteria whilst element nodes in white indicates no correlation with bacteria. Green: Cyanobacteria, Red: Bacteroidetes, Blue: Alphaproteobacteria, Orange: Gammaproteobacteria, Pink: Deltaproteobacteria, Purple: Chloroflexi, White: Planctomycetes, Brown: Spirochaetes, Light green: Verrucomicrobia, Dark purple: Firmicutes, Dark red: Gemmatimonadetes, Dark green: Others (Bacterial phyla Actinobacteria, Acidobacteria, Fibrobacteres and SAR406).

**Supplementary Figure S8. Spatial distribution and relative abundance of putative bacterial functional groups in Shark Bay microbial mats. A. Smooth mats B. Pustular mats.** Functional groups were only assigned to those bacterial taxa for which conserved functions are well described.

#### **Additional Information regarding to Supplementary Figure S6 & S7**

##### **Supplementary Figure S6:**

48 nodes

141 edges

Rhodobacterales (Alphaproteobacteria) have the most edges (13)

Elements having the most edges with bacteria: Manganese (9), Iron (4), Magnesium (3), Molybdenum (1).

##### **Supplementary Figure S7:**

42 nodes

139 edges

Rhizobiales (Alphaproteobacteria) have the most edges (6)

Elements having the most edges with bacteria: Vanadium (3), Phosphorus (1)

## Rarefaction Curves

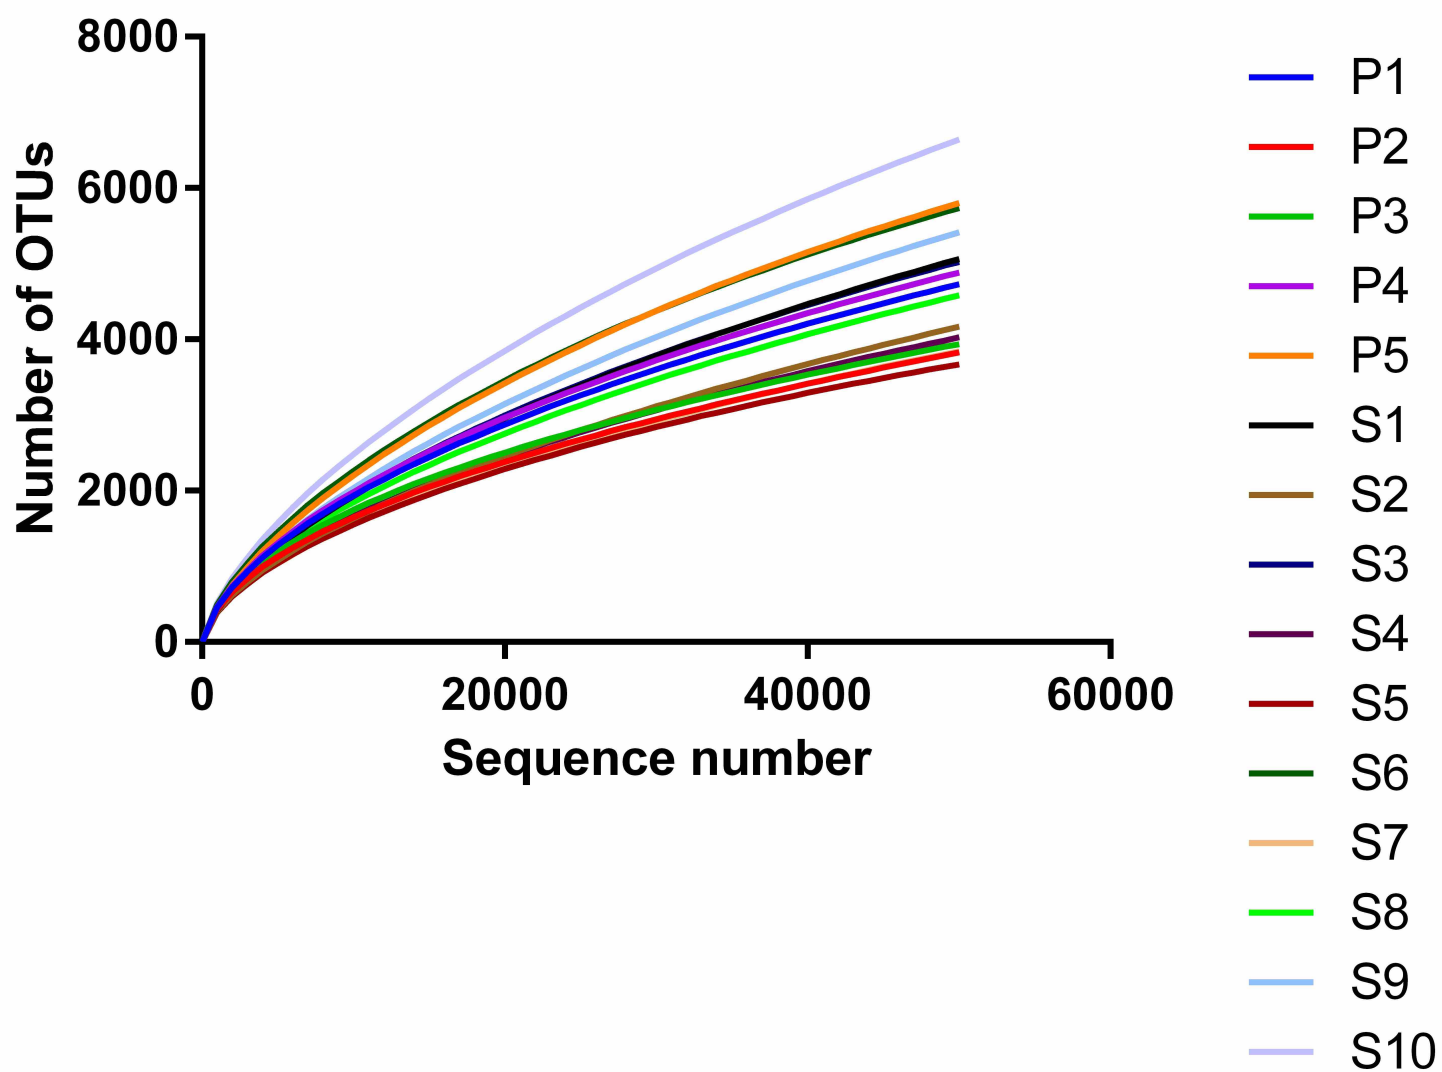



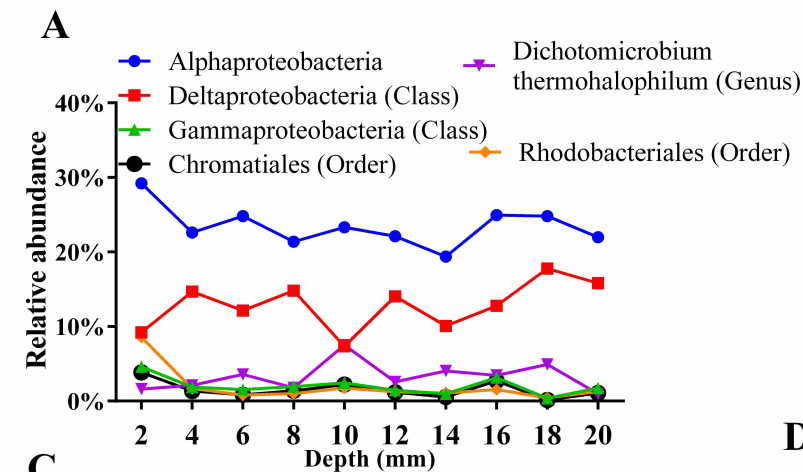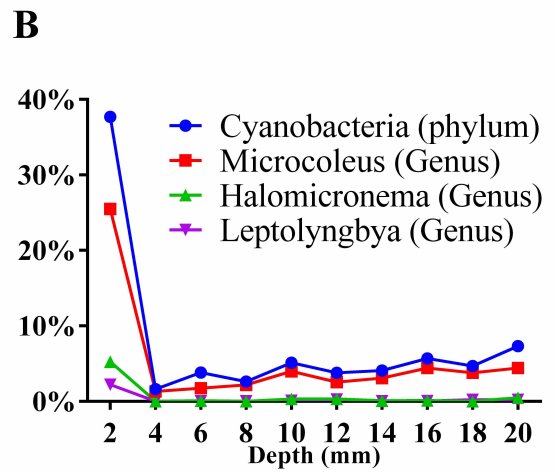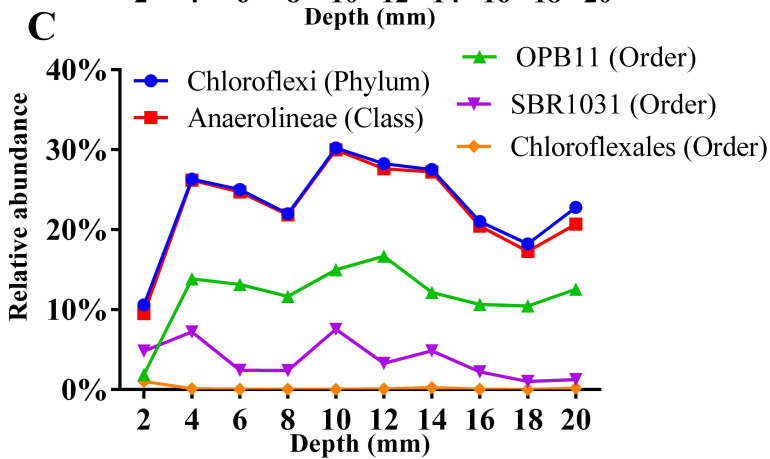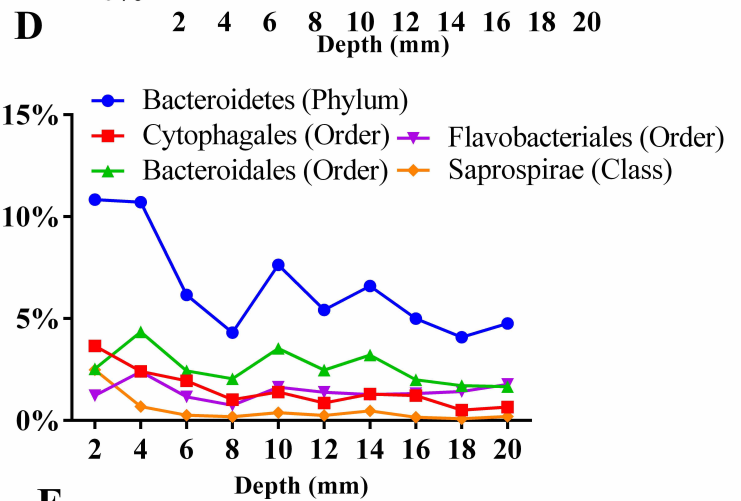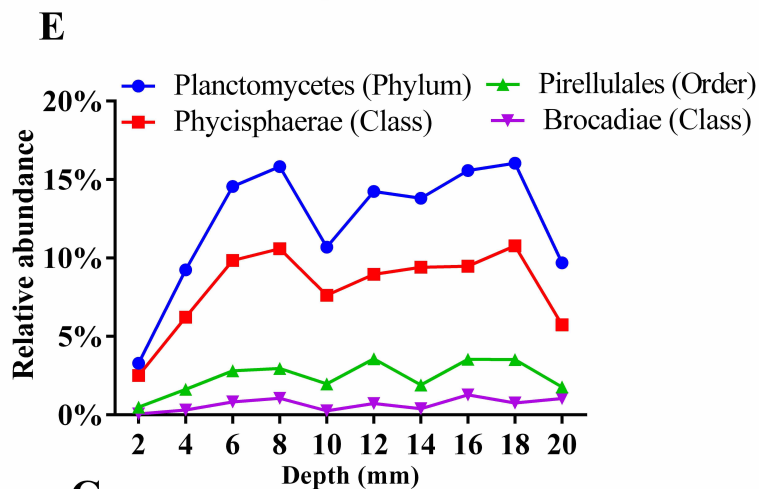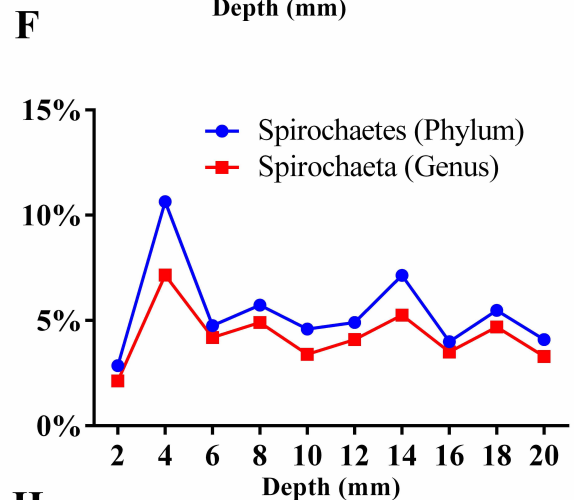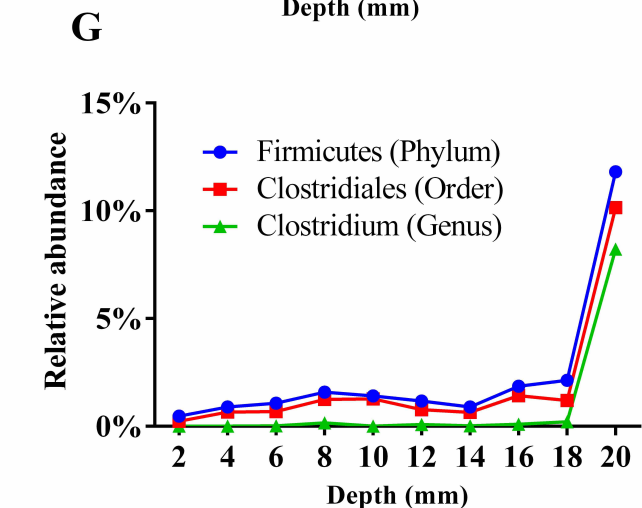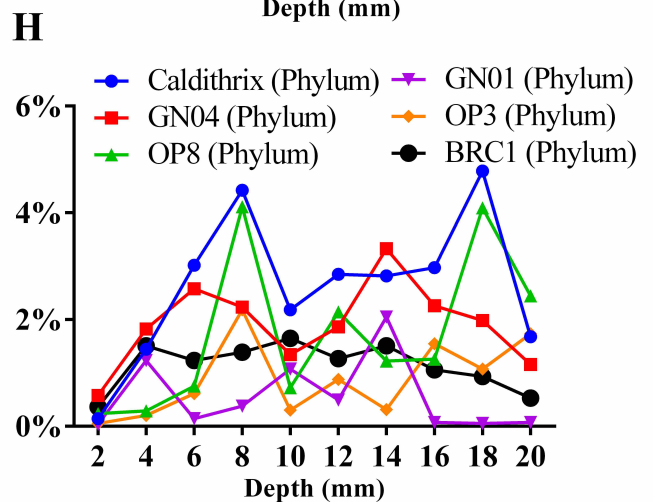

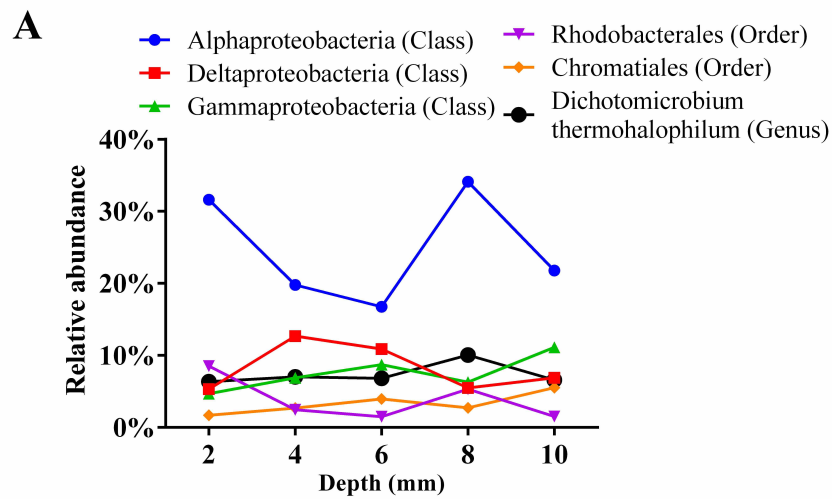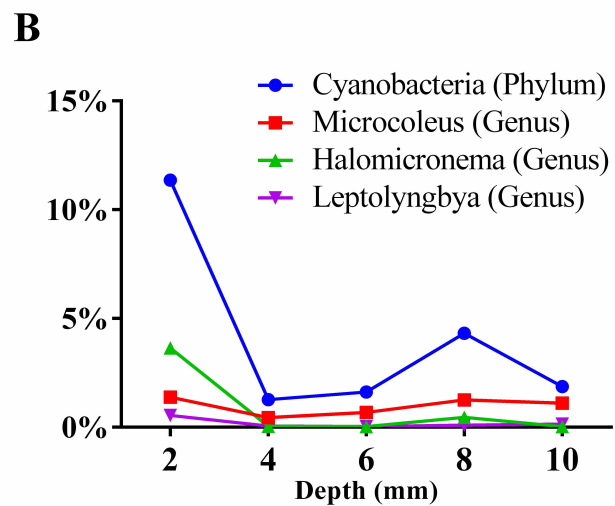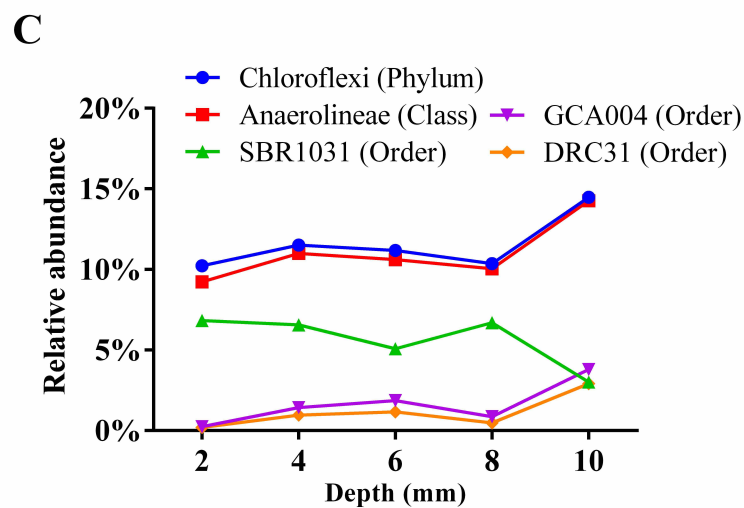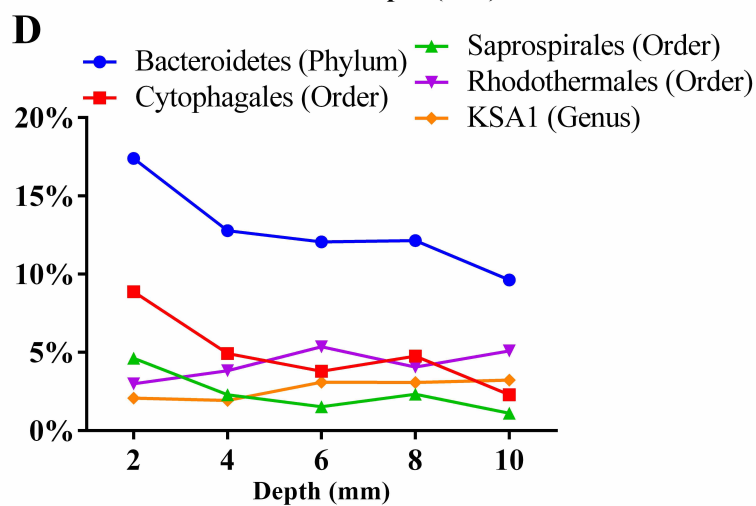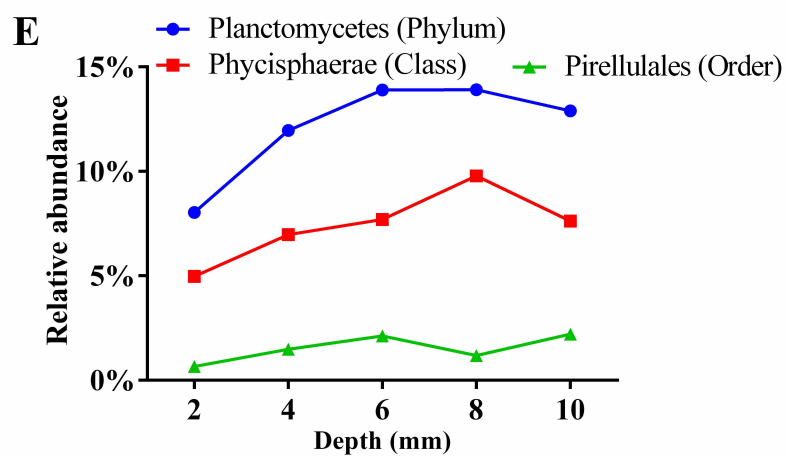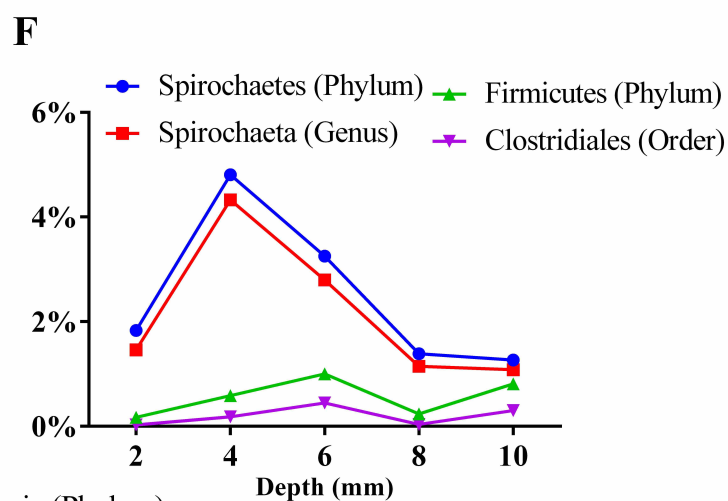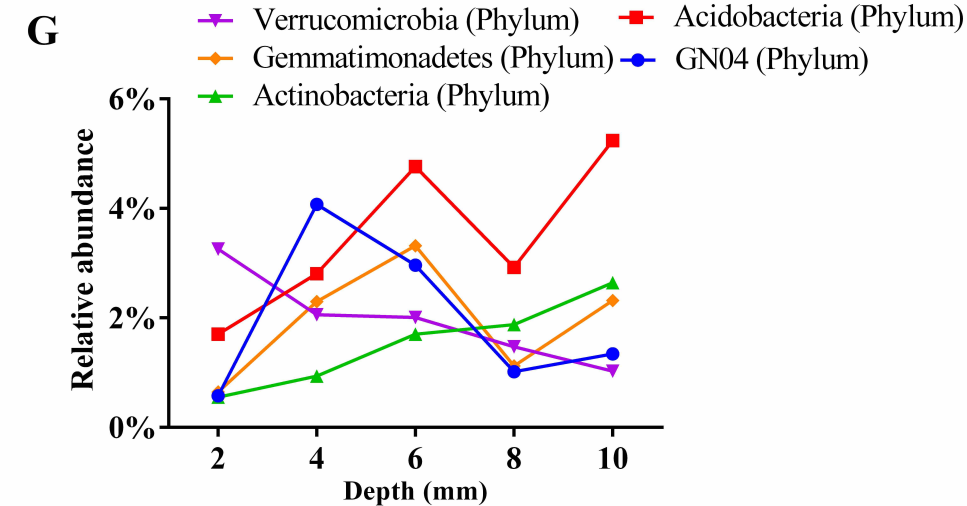

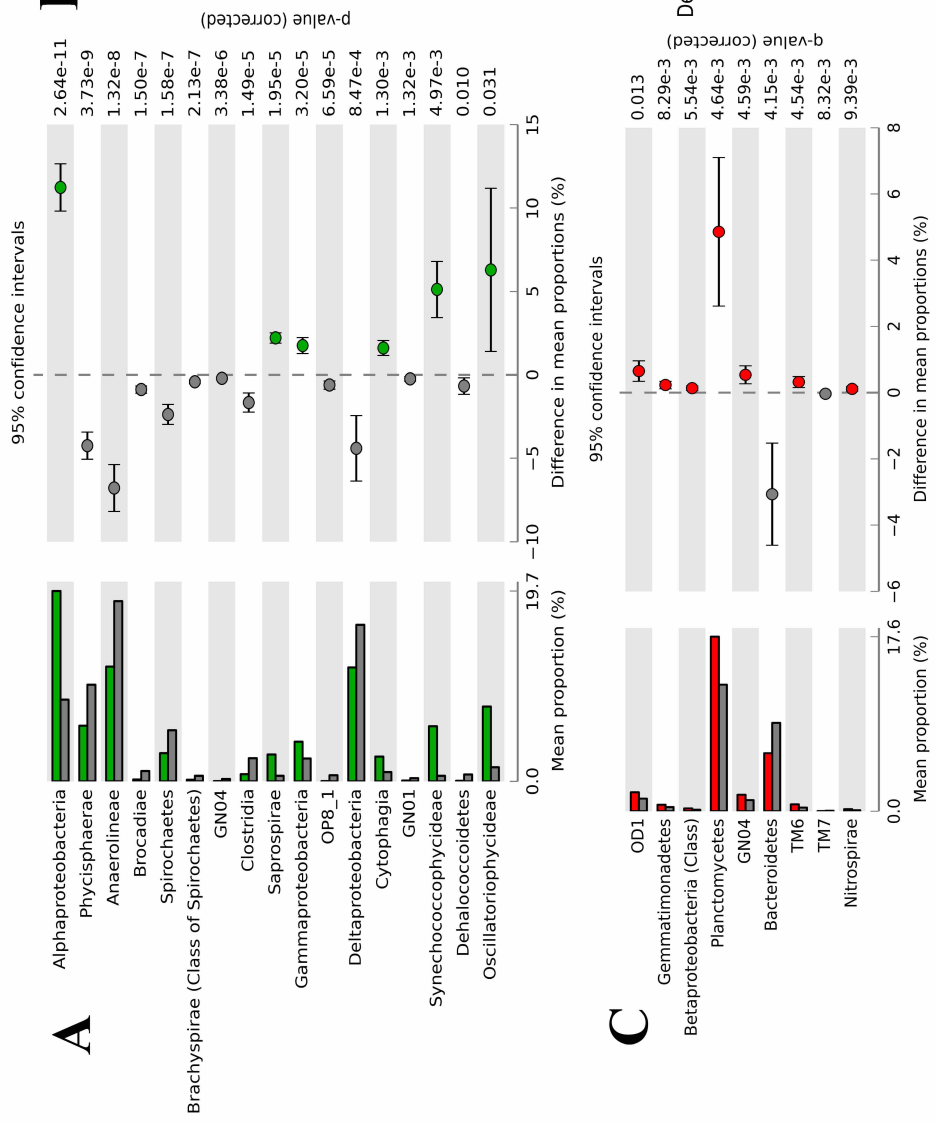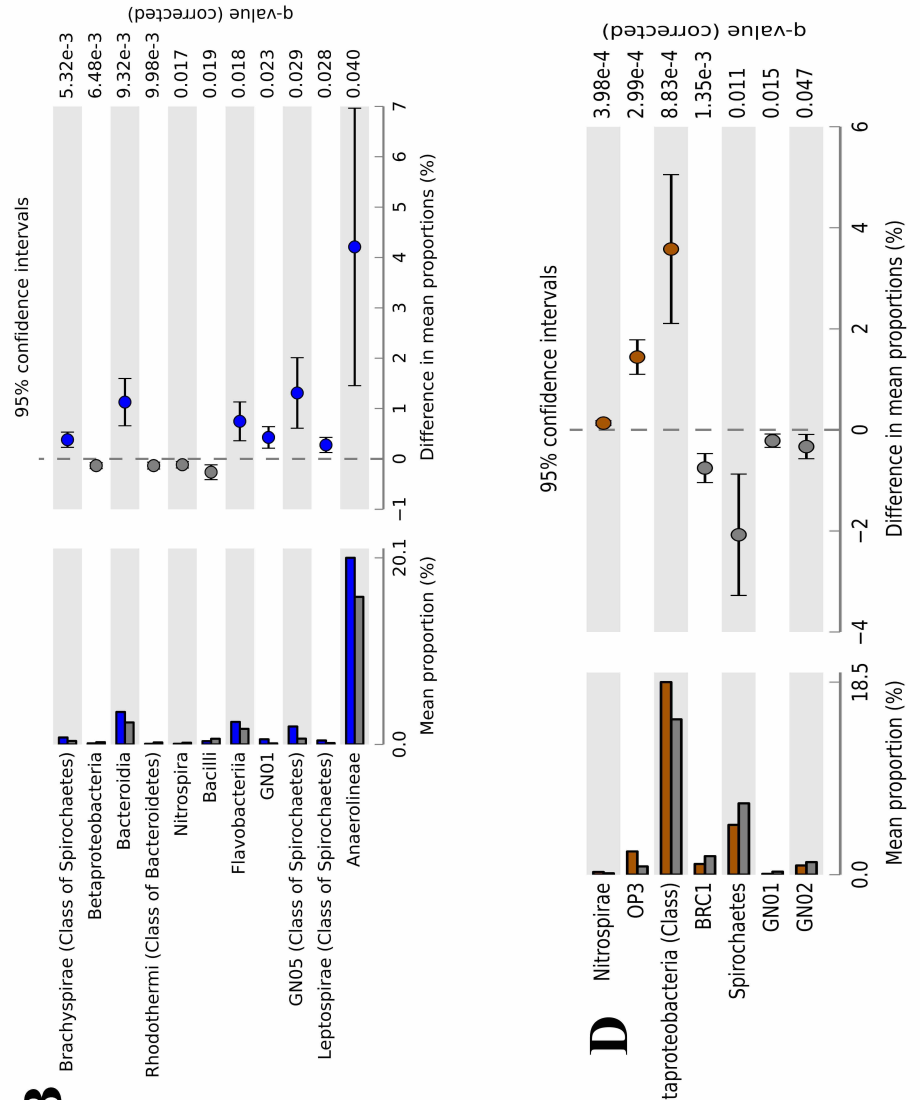

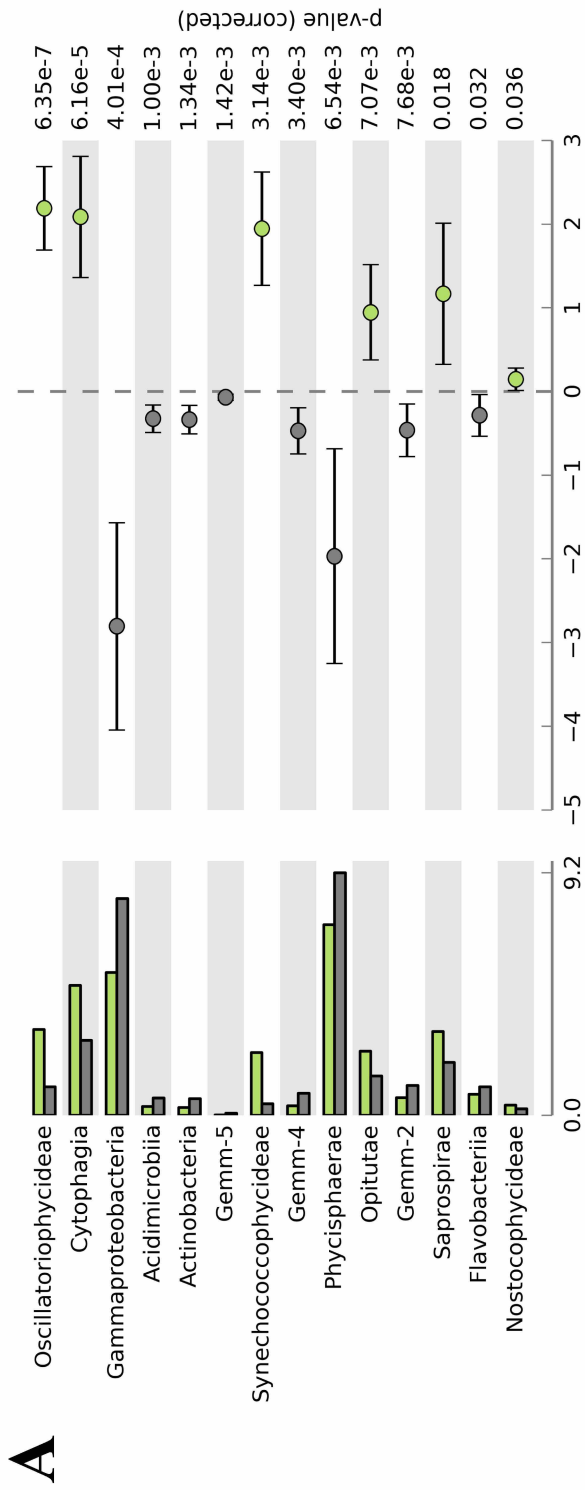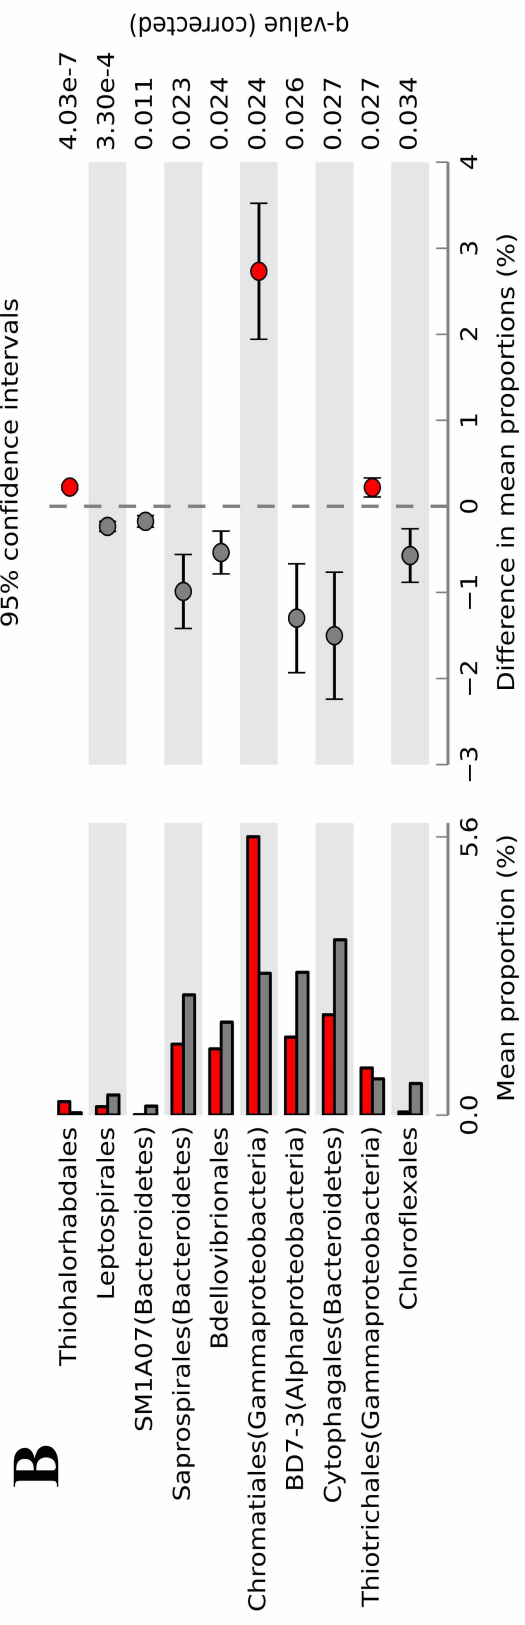







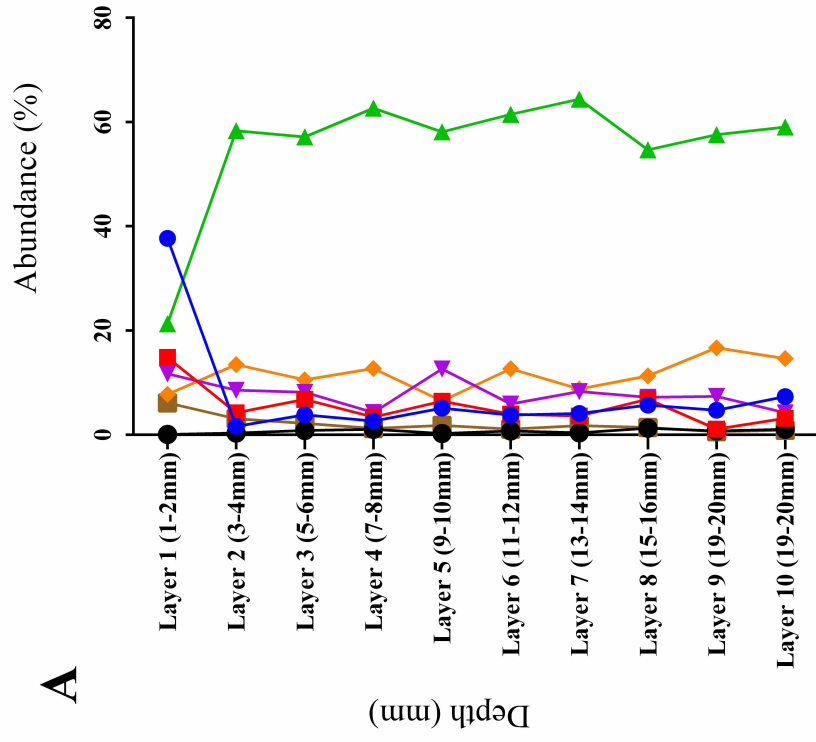

- Oxygenic phototrophs (Cyanobacteria)
- Anoxygenic phototrophs (Alphaproteobacteria, Chromiatales)
- ▲ Fermenters (Spirochaetes, Anaerolineae, Firmicutes, GN04, OP3, OP8, Planctomycetes, Caldithrix, Bacteroidales)
- ▼ Aerobic heterotrophs (Rhizobiales [*Dichotomicrobium*], Cytophagia, Saprospira, Flavobacteriia)
- ◆ Sulfate-reducing bacteria (Desulfobacterales, Desulfuovibrionales, Desulfuromonadales, Syntrophobacteriales, Desulfarculales)
- Chemoautotrophic ANAMMOX bacteria (Brocadiae)
- Potential anoxygenic phototrophs (Cytophagia, Saprospira)

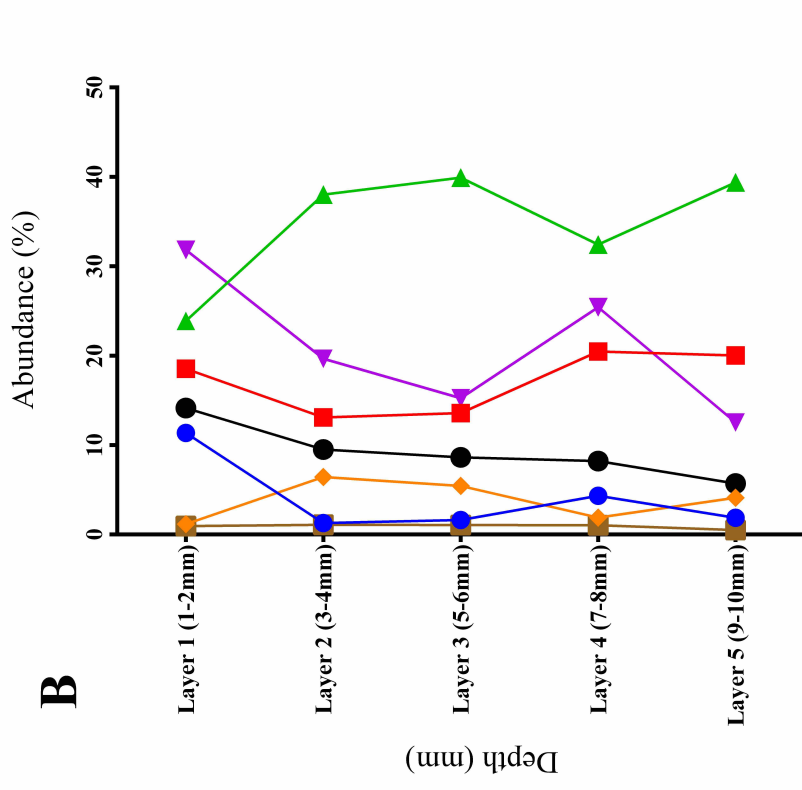

- Oxygenic phototrophs (Cyanobacteria)
- Anoxygenic phototrophs (Alphaproteobacteria, Chromiatales, Verrucomicrobia)
- ▲ Fermenters (Anaerolineae, Spirochaetes, Planctomycetes, Acidobacteria, Actinobacteria, GN04, BRC1, Bacteroidales)
- ▼ Aerobic heterotrophs (Rhizobiales [*Dichotomicrobium*], Cytophagia, Saprospira, Flavobacteriia)
- ◆ Sulfate-reducing bacteria (Desulfobacterales, Desulfuovibrionales, Desulfuromonadales, Syntrophobacteriales, Desulfarculales)
- Potential anoxygenic phototrophs (Cytophagia, Saprospira, Gemmatimonadetes)
- Predatory (Bdellovibrio)

**Supplementary Table 1.** Bacterial 16S rRNA gene diversity analyses\* of smooth and pustular mats

| Mat layers       | Depth      | Good's Coverage <sup>a</sup> | No. OTUs | Chao1 <sup>b</sup> | Shannon <sup>c</sup> |
|------------------|------------|------------------------------|----------|--------------------|----------------------|
| Pustular layer 1 | 1 - 2 mm   | 0.951                        | 4731     | 8641               | 6.361                |
| Pustular layer 2 | 3 - 4 mm   | 0.961                        | 3827     | 7434               | 6.130                |
| Pustular layer 3 | 5 - 6 mm   | 0.962                        | 3939     | 7333               | 6.271                |
| Pustular layer 4 | 7 - 8 mm   | 0.950                        | 4884     | 8574               | 6.335                |
| Pustular layer 5 | 9 - 10 mm  | 0.941                        | 5802     | 9063               | 6.259                |
| Smooth layer 1   | 1 - 2 mm   | 0.944                        | 5063     | 9479               | 5.602                |
| Smooth layer 2   | 3 - 4 mm   | 0.953                        | 4168     | 8328               | 6.105                |
| Smooth layer 3   | 5 - 6 mm   | 0.947                        | 5027     | 8518               | 6.383                |
| Smooth layer 4   | 7 - 8 mm   | 0.958                        | 4028     | 7340               | 6.130                |
| Smooth layer 5   | 9 - 10 mm  | 0.965                        | 3671     | 5781               | 5.905                |
| Smooth layer 6   | 11 - 12 mm | 0.944                        | 5738     | 8705               | 6.556                |
| Smooth layer 7   | 13 - 14 mm | 0.960                        | 3846     | 6894               | 6.005                |
| Smooth layer 8   | 15 -16 mm  | 0.952                        | 4583     | 8198               | 6.336                |
| Smooth layer 9   | 17 - 18 mm | 0.940                        | 5418     | 9727               | 6.227                |
| Smooth layer 10  | 19 - 20 mm | 0.926                        | 6646     | 12171              | 6.581                |

\* Calculated at 3% genetic divergence

<sup>a</sup>Good's Coverage measures how well the sample represents the larger environment

<sup>b</sup>Chao1 index measures the species richness (absolute number of species)

<sup>c</sup>Shannon index measures the species diversity (relative species abundance and species evenness)



**Supplementary Table 2. Novel candidate bacteria phyla and bacterial phyla that are poorly described, found in Hamelin Pool ecosystems.**

| Novel bacterial phyla    | Pustular | Smooth |
|--------------------------|----------|--------|
| Caldithrix               | 0.01%    | 2.95%  |
| GN04                     | 2%       | 1.91%  |
| OP8                      | N/A      | 1.73%  |
| GN01                     | N/A      | 0.56%  |
| OP3                      | N/A      | 0.89%  |
| Fibrobacteres            | 0.83%    | 1.05%  |
| TM6                      | 0.34%    | 0.72%  |
| SAR406                   | 0.42%    | 0.27%  |
| BRC1                     | 0.66%    | 1.14%  |
| Gemmatimonadetes         | 1.94%    | 0.45%  |
| WS3                      | 0.21%    | 0.70%  |
| GN02                     | 0.29%    | 1.22%  |
| OD1                      | 0.34%    | 1.25%  |
| Verruimicrobia           | 1.97%    | 0.54%  |
| Lentisphaerae            | 0.49%    | 0.51%  |
| NKB19                    | 0.42%    | N/A    |
| KSB3                     | N/A      | 0.48%  |
| Hyd24-12                 | N/A      | 0.11%  |
| WS1                      | N/A      | 0.11%  |
| OP9                      | N/A      | 0.10%  |
| Proportion of population | 9.92%    | 16.69% |
